# Supplementary material
Source: publisher figshare collection journal article supplement (https://acs.figshare.com/ndownloader/files/5699841)
Supplement: Supplementary file 1 [file 5699841]

# ic030037v.cif

data_CrC2cy
#=============================================================
_publ_contact_author_name       'Paul S. Wagenknecht'
_publ_contact_author_address
;
         Department of Chemistry
         San Jose State University
         San Jose, CA 95192
;
_publ_contact_author_phone      408-924-5008
_publ_contact_author_fax        408-924-4945
_publ_contact_author_email      pwagen@jupiter.sjsu.edu

#=============================================================
_publ_requested_journal 'Inorganic Chemistry'
_publ_section_title
;
    The Effects of Steric Constraint on Chromium(III) Complexes
    of Tetraazamacrocycles, 1:  Chemistry and Excited State
    Behavior of 1,4-C2-cyclam Complexes
;
loop_
_publ_author_name
_publ_author_address
         'Kimberley Wright-Garcia'
;       Department of Chemistry
         San Jose State University
         San Jose, CA 95912
;
         'Jillian Basinger'
;       Department of Chemistry
         San Jose State University
         San Jose, CA 95912
;
         'Sarah Williams'
;       Department of Chemistry
         San Jose State University
         San Jose, CA 95912
;
         'Chuanjiang Hu'
;       Department of Chemistry
         San Jose State University
         San Jose, CA 95192
;
         'Paul S. Wagenknecht'
;       Department of Chemistry
         San Jose State University
         San Jose, CA 95192
;
         'Lawrence C. Nathan'
;       Department of Chemistry
         Santa Clara University
         Santa Clara, CA 95053
;
#=========================================================

_audit_creation_method            'Siemens SHELXTL v. 5.03 1994'
_chemical_name_systematic
;
  ?
;
_chemical_name_common             ?
_chemical_formula_moiety          'C12 H26 Cl2 Cr N4, F6 P'
_chemical_formula_structural      ?
_chemical_formula_analytical      ?
_chemical_formula_sum             'C12 H26 Cl2 Cr F6 N4 P'
_chemical_formula_weight          494.24
_chemical_melting_point           ?
_chemical_compound_source         ?
 
loop_
  _atom_type_symbol
  _atom_type_description
  _atom_type_scat_dispersion_real
  _atom_type_scat_dispersion_imag
  _atom_type_scat_source
  'C'  'C'   0.0033   0.0016
  'International Tables Vol C Tables 4.2.6.8 and 6.1.1.4'
  'H'  'H'   0.0000   0.0000
  'International Tables Vol C Tables 4.2.6.8 and 6.1.1.4'
  'N'  'N'   0.0061   0.0033
  'International Tables Vol C Tables 4.2.6.8 and 6.1.1.4'
  'F'  'F'   0.0171   0.0103
  'International Tables Vol C Tables 4.2.6.8 and 6.1.1.4'
  'P'  'P'   0.1023   0.0942
  'International Tables Vol C Tables 4.2.6.8 and 6.1.1.4'
  'Cl'  'Cl'   0.1484   0.1585
  'International Tables Vol C Tables 4.2.6.8 and 6.1.1.4'
  'Cr'  'Cr'   0.3209   0.6236
  'International Tables Vol C Tables 4.2.6.8 and 6.1.1.4'
 
_symmetry_cell_setting            'Orthorhombic'
_symmetry_space_group_name_H-M    'Pbca'
 
loop_
  _symmetry_equiv_pos_as_xyz
  'x, y, z'
  '-x+1/2, -y, z+1/2'
  '-x, y+1/2, -z+1/2'
  'x+1/2, -y+1/2, -z'
  '-x, -y, -z'
  'x-1/2, y, -z-1/2'
  'x, -y-1/2, z-1/2'
  '-x-1/2, y-1/2, z'
 
_cell_length_a                    13.087(6)
_cell_length_b                    12.389(4)
_cell_length_c                    24.520(6)
_cell_angle_alpha                 90.00
_cell_angle_beta                  90.00
_cell_angle_gamma                 90.00
_cell_volume                      3975.7(23)
_cell_formula_units_Z             8
_cell_measurement_temperature     298
_cell_measurement_reflns_used     35
_cell_measurement_theta_min       3.09
_cell_measurement_theta_max       15.15
 
_exptl_crystal_description        'plate'
_exptl_crystal_colour             'green'
_exptl_crystal_size_max           0.54
_exptl_crystal_size_mid           0.48
_exptl_crystal_size_min           0.08
_exptl_crystal_density_meas       ?
_exptl_crystal_density_diffrn     1.651
_exptl_crystal_density_method     ?
_exptl_crystal_F_000              2024
_exptl_absorpt_coefficient_mu     0.984
_exptl_absorpt_correction_type    'empirical'
_exptl_absorpt_process_details
        ' S.Parkin,et.al.,J.Appl.Crystallog.,1995,28,53-56'
_exptl_absorpt_correction_T_min   0.581
_exptl_absorpt_correction_T_max   0.924
 
_exptl_special_details
;
  ?
;
 
_diffrn_ambient_temperature       298
_diffrn_radiation_wavelength      0.71073
_diffrn_radiation_type            MoK\a
_diffrn_radiation_source          'fine-focus sealed tube'
_diffrn_radiation_monochromator   graphite
_diffrn_measurement_device_type   'Siemens Bruker AXS P4'
_diffrn_measurement_method        '\w scans'
_diffrn_standards_number          3
_diffrn_standards_interval_count  97
_diffrn_standards_interval_time   ?
_diffrn_standards_decay_%         1.4
_diffrn_reflns_number             4886
_diffrn_reflns_av_R_equivalents   0.0381
_diffrn_reflns_av_sigmaI/netI     0.0426
_diffrn_reflns_limit_h_min        0
_diffrn_reflns_limit_h_max        15
_diffrn_reflns_limit_k_min        0
_diffrn_reflns_limit_k_max        14
_diffrn_reflns_limit_l_min        0
_diffrn_reflns_limit_l_max        29
_diffrn_reflns_theta_min          2.28
_diffrn_reflns_theta_max          25.00

# our software Siemens XSCANS-SHELXTL does not determine the next three items
_diffrn_reflns_theta_full       ?
_diffrn_measured_fraction_theta_max     ?
_diffrn_measured_fraction_theta_full    ?


_reflns_number_total              3484
_reflns_number_gt                 2194
_reflns_threshold_expression      >2sigma(I)

_computing_data_collection        'Siemens XSCANS v. 2.2 1995'
_computing_cell_refinement        'Siemens XSCANS v. 2.2 1995'
_computing_data_reduction         'Siemens XSCANS v. 2.2 1995'
_computing_structure_solution     'Siemens SHELXTL v. 5.03 1994'
_computing_structure_refinement   'Siemens SHELXTL v. 5.03 1994'
_computing_molecular_graphics     'Siemens SHELXTL v. 5.03 1994'
_computing_publication_material   'Siemens SHELXTL v. 5.03 1994'

 
_refine_special_details
;
  Refinement on F^2^ for ALL reflections except for 13 with very negative F^2^
  or flagged by the user for potential systematic errors.  Weighted R-factors
  wR and all goodnesses of fit S are based on F^2^, conventional R-factors R
  are based on F, with F set to zero for negative F^2^. The observed criterion
  of F^2^ > 2sigma(F^2^) is used only for calculating R_factor_ref etc. and is
  not relevant to the choice of reflections for refinement.  R-factors based
  on F^2^ are statistically about twice as large as those based on F, and R-
  factors based on ALL data will be even larger.
 
  Disorder of PF6 was modeled with four orientations;  sum of the site
  occupancy factors is 1.016; thus the UNIT instruction and Atom List
  differ slightly.
;
 
_refine_ls_structure_factor_coef  Fsqd
_refine_ls_matrix_type            full
_refine_ls_weighting_scheme       calc
_refine_ls_weighting_details
  ' w=1/[\s^2^(Fo^2^)+(0.1502P)^2^+17.9193P] where P=(Fo^2^+2Fc^2^)/3'
_atom_sites_solution_primary      direct
_atom_sites_solution_secondary    difmap
_atom_sites_solution_hydrogens    geom
_refine_ls_hydrogen_treatment     none
_refine_ls_extinction_method      SHELXL
_refine_ls_extinction_coef        0.0004(2)
_refine_ls_extinction_expression
  'Fc^*^=kFc[1+0.001xFc^2^\l^3^/sin(2\q)]^-1/4^'
_refine_ls_number_reflns          3471
_refine_ls_number_parameters      270
_refine_ls_number_restraints      1223
#_refine_ls_R_factor_all           0.1357
_refine_ls_R_factor_gt            0.0819
#_refine_ls_wR_factor_all          0.3094
_refine_ls_wR_factor_ref          0.2165
#_refine_ls_goodness_of_fit_all    1.036
_refine_ls_goodness_of_fit_ref    1.012
#_refine_ls_restrained_S_all       1.065
#_refine_ls_restrained_S_ref       0.956
_refine_ls_shift/su_max          -0.004
_refine_ls_shift/su_mean         0.000
_refine_diff_density_max    1.355
_refine_diff_density_min   -0.706
_refine_diff_density_rms    0.134
 
loop_
  _atom_site_label
  _atom_site_type_symbol
  _atom_site_fract_x
  _atom_site_fract_y
  _atom_site_fract_z
  _atom_site_U_iso_or_equiv
  _atom_site_thermal_displace_type
  _atom_site_occupancy
  _atom_site_calc_flag
  _atom_site_refinement_flags
  _atom_site_disorder_group
Cr Cr 0.52157(8) -0.87289(10) 0.63448(4) 0.0438(4) Uani 1 d . .
Cl1 Cl 0.4140(2) -0.7758(2) 0.69371(8) 0.0614(6) Uani 1 d . .
Cl2 Cl 0.6281(2) -0.9973(2) 0.58858(10) 0.0721(7) Uani 1 d . .
N1 N 0.6082(5) -0.7512(5) 0.5998(3) 0.059(2) Uani 1 d . .
N2 N 0.6006(5) -0.9061(7) 0.7067(3) 0.071(2) Uani 1 d . .
H2 H 0.5714(5) -0.8630(7) 0.7324(3) 0.085 Uiso 1 calc R .
N3 N 0.4421(6) -1.0122(6) 0.6548(3) 0.066(2) Uani 1 d . .
H3 H 0.4716(6) -1.0660(6) 0.6351(3) 0.079 Uiso 1 calc R .
N4 N 0.4394(6) -0.8094(8) 0.5705(3) 0.079(2) Uani 1 d . .
C1 C 0.7133(8) -0.7390(10) 0.6238(5) 0.093(3) Uani 1 d . .
H1A H 0.7383(8) -0.6669(10) 0.6160(5) 0.112 Uiso 1 calc R .
H1B H 0.7590(8) -0.7900(10) 0.6063(5) 0.112 Uiso 1 calc R .
C2 C 0.7166(8) -0.7578(11) 0.6865(5) 0.097(4) Uani 1 d . .
H2A H 0.6620(8) -0.7160(11) 0.7030(5) 0.117 Uiso 1 calc R .
H2B H 0.7807(8) -0.7293(11) 0.7002(5) 0.117 Uiso 1 calc R .
C3 C 0.7062(7) -0.8771(9) 0.7063(4) 0.081(3) Uani 1 d . .
H3A H 0.7437(7) -0.9246(9) 0.6821(4) 0.097 Uiso 1 calc R .
H3B H 0.7345(7) -0.8843(9) 0.7427(4) 0.097 Uiso 1 calc R .
C4 C 0.5730(9) -1.0177(7) 0.7225(4) 0.075(3) Uani 1 d . .
H4A H 0.5875(9) -1.0283(7) 0.7610(4) 0.090 Uiso 1 calc R .
H4B H 0.6140(9) -1.0685(7) 0.7019(4) 0.090 Uiso 1 calc R .
C5 C 0.4617(9) -1.0387(8) 0.7119(4) 0.079(3) Uani 1 d . .
H5A H 0.4457(9) -1.1139(8) 0.7189(4) 0.095 Uiso 1 calc R .
H5B H 0.4198(9) -0.9942(8) 0.7356(4) 0.095 Uiso 1 calc R .
C6 C 0.3348(7) -1.0077(8) 0.6365(4) 0.076(3) Uani 1 d . .
H6A H 0.2979(7) -0.9547(8) 0.6580(4) 0.091 Uiso 1 calc R .
H6B H 0.3028(7) -1.0774(8) 0.6421(4) 0.091 Uiso 1 calc R .
C7 C 0.3291(8) -0.9776(9) 0.5765(4) 0.085(3) Uani 1 d . .
H7A H 0.2649(8) -1.0045(9) 0.5622(4) 0.102 Uiso 1 calc R .
H7B H 0.3836(8) -1.0152(9) 0.5576(4) 0.102 Uiso 1 calc R .
C8 C 0.3370(8) -0.8574(11) 0.5624(4) 0.097(4) Uani 1 d . .
H8A H 0.3174(8) -0.8478(11) 0.5245(4) 0.116 Uiso 1 calc R .
H8B H 0.2882(8) -0.8180(11) 0.5845(4) 0.116 Uiso 1 calc R .
C9 C 0.4385(9) -0.6885(9) 0.5788(5) 0.091(3) Uani 1 d . .
H9A H 0.3832(9) -0.6683(9) 0.6031(5) 0.110 Uiso 1 calc R .
H9B H 0.4284(9) -0.6521(9) 0.5442(5) 0.110 Uiso 1 calc R .
C10 C 0.5466(9) -0.6542(9) 0.6049(5) 0.091(3) Uani 1 d . .
H10A H 0.5769(9) -0.5947(9) 0.5849(5) 0.109 Uiso 1 calc R .
H10B H 0.5388(9) -0.6335(9) 0.6428(5) 0.109 Uiso 1 calc R .
C11 C 0.5091(7) -0.8227(10) 0.5227(4) 0.078(3) Uani 1 d . .
H11A H 0.4823(7) -0.7846(10) 0.4912(4) 0.094 Uiso 1 calc R .
H11B H 0.5163(7) -0.8984(10) 0.5135(4) 0.094 Uiso 1 calc R .
C12 C 0.6127(8) -0.7750(9) 0.5398(4) 0.083(3) Uani 1 d . .
H12A H 0.6671(8) -0.8261(9) 0.5323(4) 0.100 Uiso 1 calc R .
H12B H 0.6263(8) -0.7093(9) 0.5196(4) 0.100 Uiso 1 calc R .
P1 P 0.4689(2) -0.3430(2) 0.62728(9) 0.0610(6) Uani 1 d D .
F1 F 0.4017(11) -0.3044(10) 0.6799(4) 0.074(2) Uani 0.474(9) d PD 1
F2 F 0.4009(9) -0.4519(8) 0.6217(7) 0.074(2) Uani 0.474(9) d PD 1
F3 F 0.3947(9) -0.2815(11) 0.5867(4) 0.074(2) Uani 0.474(9) d PD 1
F4 F 0.5376(8) -0.2370(8) 0.6356(7) 0.074(2) Uani 0.474(9) d PD 1
F5 F 0.5431(12) -0.4070(12) 0.6693(5) 0.074(2) Uani 0.474(9) d PD 1
F6 F 0.5381(11) -0.3813(11) 0.5773(4) 0.074(2) Uani 0.474(9) d PD 1
F1' F 0.3793(12) -0.3386(16) 0.6722(7) 0.074(2) Uani 0.266(9) d PD 2
F2' F 0.4099(13) -0.4302(14) 0.5933(9) 0.074(2) Uani 0.266(9) d PD 2
F3' F 0.4163(14) -0.2425(13) 0.5948(7) 0.074(2) Uani 0.266(9) d PD 2
F4' F 0.5304(12) -0.2509(13) 0.6631(8) 0.074(2) Uani 0.266(9) d PD 2
F5' F 0.5241(16) -0.4346(14) 0.6615(9) 0.074(2) Uani 0.266(9) d PD 2
F6' F 0.5618(12) -0.3396(16) 0.5843(7) 0.074(2) Uani 0.266(9) d PD 2
F1" F 0.3906(17) -0.4394(17) 0.6445(11) 0.074(2) Uani 0.172(9) d PD 3
F2" F 0.4819(25) -0.4011(19) 0.5684(8) 0.074(2) Uani 0.172(9) d PD 3
F3" F 0.3708(15) -0.2777(20) 0.6024(10) 0.074(2) Uani 0.172(9) d PD 3
F4" F 0.4504(24) -0.2851(19) 0.6845(7) 0.074(2) Uani 0.172(9) d PD 3
F5" F 0.5644(14) -0.4087(21) 0.6498(13) 0.067(10) Uani 0.172(9) d PD 3
F6" F 0.5415(17) -0.2463(17) 0.6075(12) 0.074(2) Uani 0.172(9) d PD 3
F1'" F 0.3675(18) -0.2928(28) 0.6539(14) 0.074(2) Uani 0.104(6) d PD 4
F2'" F 0.4300(30) -0.4637(18) 0.6456(16) 0.074(2) Uani 0.104(6) d PD 4
F3'" F 0.4049(23) -0.3621(31) 0.5704(9) 0.074(2) Uani 0.104(6) d PD 4
F4'" F 0.5015(28) -0.2265(17) 0.6054(14) 0.074(2) Uani 0.104(6) d PD 4
F5'" F 0.5316(24) -0.3255(34) 0.6823(9) 0.074(2) Uani 0.104(6) d PD 4
F6'" F 0.5671(19) -0.3974(28) 0.5990(14) 0.074(2) Uani 0.104(6) d PD 4
 
loop_
  _atom_site_aniso_label
  _atom_site_aniso_U_11
  _atom_site_aniso_U_22
  _atom_site_aniso_U_33
  _atom_site_aniso_U_23
  _atom_site_aniso_U_13
  _atom_site_aniso_U_12
Cr 0.0398(7) 0.0501(7) 0.0416(6) -0.0076(5) 0.0041(5) 0.0011(5)
Cl1 0.0627(12) 0.0660(13) 0.0556(11) -0.0136(9) 0.0135(9) 0.0085(10)
Cl2 0.0650(13) 0.0682(13) 0.0829(15) -0.0190(11) 0.0209(11) 0.0051(11)
N1 0.065(4) 0.047(4) 0.065(4) -0.004(3) 0.018(3) -0.005(3)
N2 0.064(4) 0.090(5) 0.059(4) -0.010(4) -0.004(3) 0.008(4)
N3 0.078(5) 0.064(4) 0.056(4) -0.012(3) 0.016(4) -0.001(4)
N4 0.068(5) 0.112(7) 0.058(4) 0.002(4) 0.005(4) 0.026(5)
C1 0.062(6) 0.112(9) 0.106(8) 0.001(7) 0.007(5) -0.039(6)
C2 0.077(7) 0.133(10) 0.081(7) -0.024(7) -0.014(5) -0.027(7)
C3 0.068(6) 0.100(8) 0.075(6) -0.018(5) -0.020(5) 0.006(6)
C4 0.114(8) 0.058(5) 0.054(5) 0.011(4) -0.003(5) 0.011(5)
C5 0.114(8) 0.065(6) 0.060(5) 0.003(4) 0.022(5) 0.004(6)
C6 0.055(5) 0.076(6) 0.096(7) -0.027(5) 0.020(5) -0.033(5)
C7 0.055(5) 0.104(8) 0.097(8) -0.032(6) 0.007(5) -0.013(6)
C8 0.059(6) 0.155(12) 0.076(7) -0.018(7) -0.017(5) 0.014(7)
C9 0.107(8) 0.080(7) 0.087(7) 0.016(6) 0.008(6) 0.048(7)
C10 0.106(8) 0.075(7) 0.091(7) 0.011(6) 0.021(7) 0.005(6)
C11 0.078(6) 0.109(8) 0.048(5) 0.003(5) 0.009(4) 0.003(6)
C12 0.089(7) 0.100(7) 0.061(5) 0.007(5) 0.020(5) -0.013(6)
P1 0.0664(14) 0.0593(14) 0.0573(13) 0.0014(10) -0.0024(10) -0.0031(11)
F1 0.079(3) 0.077(3) 0.065(3) 0.001(2) -0.003(2) -0.008(2)
F2 0.079(3) 0.077(3) 0.065(3) 0.001(2) -0.003(2) -0.008(2)
F3 0.079(3) 0.077(3) 0.065(3) 0.001(2) -0.003(2) -0.008(2)
F4 0.079(3) 0.077(3) 0.065(3) 0.001(2) -0.003(2) -0.008(2)
F5 0.079(3) 0.077(3) 0.065(3) 0.001(2) -0.003(2) -0.008(2)
F6 0.079(3) 0.077(3) 0.065(3) 0.001(2) -0.003(2) -0.008(2)
F1' 0.079(3) 0.077(3) 0.065(3) 0.001(2) -0.003(2) -0.008(2)
F2' 0.079(3) 0.077(3) 0.065(3) 0.001(2) -0.003(2) -0.008(2)
F3' 0.079(3) 0.077(3) 0.065(3) 0.001(2) -0.003(2) -0.008(2)
F4' 0.079(3) 0.077(3) 0.065(3) 0.001(2) -0.003(2) -0.008(2)
F5' 0.079(3) 0.077(3) 0.065(3) 0.001(2) -0.003(2) -0.008(2)
F6' 0.079(3) 0.077(3) 0.065(3) 0.001(2) -0.003(2) -0.008(2)
F1" 0.079(3) 0.077(3) 0.065(3) 0.001(2) -0.003(2) -0.008(2)
F2" 0.079(3) 0.077(3) 0.065(3) 0.001(2) -0.003(2) -0.008(2)
F3" 0.079(3) 0.077(3) 0.065(3) 0.001(2) -0.003(2) -0.008(2)
F4" 0.079(3) 0.077(3) 0.065(3) 0.001(2) -0.003(2) -0.008(2)
F5" 0.039(15) 0.089(21) 0.073(22) 0.054(18) 0.009(13) 0.012(15)
F6" 0.079(3) 0.077(3) 0.065(3) 0.001(2) -0.003(2) -0.008(2)
F1'" 0.079(3) 0.077(3) 0.065(3) 0.001(2) -0.003(2) -0.008(2)
F2'" 0.079(3) 0.077(3) 0.065(3) 0.001(2) -0.003(2) -0.008(2)
F3'" 0.079(3) 0.077(3) 0.065(3) 0.001(2) -0.003(2) -0.008(2)
F4'" 0.079(3) 0.077(3) 0.065(3) 0.001(2) -0.003(2) -0.008(2)
F5'" 0.079(3) 0.077(3) 0.065(3) 0.001(2) -0.003(2) -0.008(2)
F6'" 0.079(3) 0.077(3) 0.065(3) 0.001(2) -0.003(2) -0.008(2)
 
_geom_special_details
;
  All esds (except the esd in the dihedral angle between two l.s. planes)
  are estimated using the full covariance matrix.  The cell esds are taken
  into account individually in the estimation of esds in distances, angles
  and torsion angles; correlations between esds in cell parameters are only
  used when they are defined by crystal symmetry.  An approximate (isotropic)
  treatment of cell esds is used for estimating esds involving l.s. planes.
;
 
loop_
  _geom_bond_atom_site_label_1
  _geom_bond_atom_site_label_2
  _geom_bond_distance
  _geom_bond_site_symmetry_2
  _geom_bond_publ_flag
Cr N4 2.058(8) . ?
Cr N1 2.069(6) . ?
Cr N3 2.076(7) . ?
Cr N2 2.091(7) . ?
Cr Cl1 2.353(2) . ?
Cr Cl2 2.364(2) . ?
N1 C10 1.453(12) . ?
N1 C1 1.504(12) . ?
N1 C12 1.502(11) . ?
N2 C3 1.428(12) . ?
N2 C4 1.481(12) . ?
N2 H2 0.91 . ?
N3 C5 1.461(12) . ?
N3 C6 1.475(12) . ?
N3 H3 0.91 . ?
N4 C8 1.480(13) . ?
N4 C11 1.495(11) . ?
N4 C9 1.512(14) . ?
C1 C2 1.55(2) . ?
C1 H1A 0.97 . ?
C1 H1B 0.97 . ?
C2 C3 1.56(2) . ?
C2 H2A 0.97 . ?
C2 H2B 0.97 . ?
C3 H3A 0.97 . ?
C3 H3B 0.97 . ?
C4 C5 1.502(15) . ?
C4 H4A 0.97 . ?
C4 H4B 0.97 . ?
C5 H5A 0.97 . ?
C5 H5B 0.97 . ?
C6 C7 1.520(15) . ?
C6 H6A 0.97 . ?
C6 H6B 0.97 . ?
C7 C8 1.53(2) . ?
C7 H7A 0.97 . ?
C7 H7B 0.97 . ?
C8 H8A 0.97 . ?
C8 H8B 0.97 . ?
C9 C10 1.61(2) . ?
C9 H9A 0.97 . ?
C9 H9B 0.97 . ?
C10 H10A 0.97 . ?
C10 H10B 0.97 . ?
C11 C12 1.537(14) . ?
C11 H11A 0.97 . ?
C11 H11B 0.97 . ?
C12 H12A 0.97 . ?
C12 H12B 0.97 . ?
P1 F2' 1.568(13) . ?
P1 F3 1.585(9) . ?
P1 F5' 1.586(14) . ?
P1 F5" 1.591(14) . ?
P1 F5'" 1.59(2) . ?
P1 F4" 1.593(14) . ?
P1 F6 1.596(9) . ?
P1 F4'" 1.60(2) . ?
P1 F6" 1.604(14) . ?
P1 F1'" 1.60(2) . ?
P1 F4 1.605(9) . ?
P1 F6'" 1.61(2) . ?
 
loop_
  _geom_angle_atom_site_label_1
  _geom_angle_atom_site_label_2
  _geom_angle_atom_site_label_3
  _geom_angle
  _geom_angle_site_symmetry_1
  _geom_angle_site_symmetry_3
  _geom_angle_publ_flag
N4 Cr N1 72.2(3) . . ?
N4 Cr N3 103.8(3) . . ?
N1 Cr N3 168.3(3) . . ?
N4 Cr N2 168.2(3) . . ?
N1 Cr N2 102.7(3) . . ?
N3 Cr N2 83.2(3) . . ?
N4 Cr Cl1 87.8(2) . . ?
N1 Cr Cl1 102.1(2) . . ?
N3 Cr Cl1 88.7(2) . . ?
N2 Cr Cl1 82.8(2) . . ?
N4 Cr Cl2 101.2(2) . . ?
N1 Cr Cl2 87.5(2) . . ?
N3 Cr Cl2 82.4(2) . . ?
N2 Cr Cl2 89.0(2) . . ?
Cl1 Cr Cl2 168.55(10) . . ?
C10 N1 C1 113.1(8) . . ?
C10 N1 C12 105.5(8) . . ?
C1 N1 C12 111.6(7) . . ?
C10 N1 Cr 105.3(6) . . ?
C1 N1 Cr 114.5(6) . . ?
C12 N1 Cr 106.3(5) . . ?
C3 N2 C4 118.2(8) . . ?
C3 N2 Cr 115.1(6) . . ?
C4 N2 Cr 106.6(6) . . ?
C3 N2 H2 105.3    . . ?
C4 N2 H2 105.3    . . ?
Cr N2 H2 105.3    . . ?
C5 N3 C6 117.9(8) . . ?
C5 N3 Cr 109.2(6) . . ?
C6 N3 Cr 111.9(6) . . ?
C5 N3 H3 105.6    . . ?
C6 N3 H3 105.6    . . ?
Cr N3 H3 105.6    . . ?
C8 N4 C11 113.8(8) . . ?
C8 N4 C9 114.1(9) . . ?
C11 N4 C9 102.7(9) . . ?
C8 N4 Cr 115.0(7) . . ?
C11 N4 Cr 103.7(6) . . ?
C9 N4 Cr 106.3(6) . . ?
N1 C1 C2 113.4(8) . . ?
N1 C1 H1A 108.9    . . ?
C2 C1 H1A 108.9    . . ?
N1 C1 H1B 108.9    . . ?
C2 C1 H1B 108.9    . . ?
H1A C1 H1B 107.7 . . ?
C1 C2 C3 116.5(9) . . ?
C1 C2 H2A 108.2    . . ?
C3 C2 H2A 108.2    . . ?
C1 C2 H2B 108.2    . . ?
C3 C2 H2B 108.2    . . ?
H2A C2 H2B 107.3 . . ?
N2 C3 C2 108.9(8) . . ?
N2 C3 H3A 109.9    . . ?
C2 C3 H3A 109.9    . . ?
N2 C3 H3B 109.9    . . ?
C2 C3 H3B 109.9    . . ?
H3A C3 H3B 108.3 . . ?
N2 C4 C5 110.7(8) . . ?
N2 C4 H4A 109.5    . . ?
C5 C4 H4A 109.5    . . ?
N2 C4 H4B 109.5    . . ?
C5 C4 H4B 109.5    . . ?
H4A C4 H4B 108.1 . . ?
N3 C5 C4 107.3(8) . . ?
N3 C5 H5A 110.3    . . ?
C4 C5 H5A 110.3    . . ?
N3 C5 H5B 110.3    . . ?
C4 C5 H5B 110.3    . . ?
H5A C5 H5B 108.5 . . ?
N3 C6 C7 110.5(7) . . ?
N3 C6 H6A 109.5    . . ?
C7 C6 H6A 109.5    . . ?
N3 C6 H6B 109.5    . . ?
C7 C6 H6B 109.5    . . ?
H6A C6 H6B 108.1 . . ?
C6 C7 C8 117.0(8) . . ?
C6 C7 H7A 108.0    . . ?
C8 C7 H7A 108.0    . . ?
C6 C7 H7B 108.0    . . ?
C8 C7 H7B 108.0    . . ?
H7A C7 H7B 107.3 . . ?
N4 C8 C7 114.9(9) . . ?
N4 C8 H8A 108.6    . . ?
C7 C8 H8A 108.6    . . ?
N4 C8 H8B 108.6    . . ?
C7 C8 H8B 108.6    . . ?
H8A C8 H8B 107.5 . . ?
N4 C9 C10 107.9(8) . . ?
N4 C9 H9A 110.1    . . ?
C10 C9 H9A 110.1    . . ?
N4 C9 H9B 110.1    . . ?
C10 C9 H9B 110.1    . . ?
H9A C9 H9B 108.4 . . ?
N1 C10 C9 103.7(8) . . ?
N1 C10 H10A 111.0    . . ?
C9 C10 H10A 111.0    . . ?
N1 C10 H10B 111.0    . . ?
C9 C10 H10B 111.0    . . ?
H10A C10 H10B 109.0 . . ?
N4 C11 C12 106.4(8) . . ?
N4 C11 H11A 110.4    . . ?
C12 C11 H11A 110.4    . . ?
N4 C11 H11B 110.4    . . ?
C12 C11 H11B 110.4    . . ?
H11A C11 H11B 108.6 . . ?
N1 C12 C11 108.0(7) . . ?
N1 C12 H12A 110.1    . . ?
C11 C12 H12A 110.1    . . ?
N1 C12 H12B 110.1    . . ?
C11 C12 H12B 110.1    . . ?
H12A C12 H12B 108.4 . . ?
F2' P1 F5' 90.7(10) . . ?
F5" P1 F4" 92.6(10) . . ?
F3 P1 F6 90.5(5) . . ?
F5'" P1 F4'" 91.4(12) . . ?
F5" P1 F6" 91.3(9) . . ?
F4" P1 F6" 91.2(9) . . ?
F5'" P1 F1'" 91.7(10) . . ?
F4'" P1 F1'" 90.5(10) . . ?
F5'" P1 F6'" 90.6(10) . . ?
F4'" P1 F6'" 91.2(10) . . ?
F1'" P1 F6'" 177.2(12) . . ?
F3 P1 F4 91.7(5) . . ?
F6 P1 F4 91.3(5) . . ?

#===END
